# Supplementary material for: MIDcor, an R-program for deciphering mass interferences in mass spectra of metabolites enriched in stable isotopes
Source: Springer Nature journal article supplement (doi:10.1186/s12859-017-1513-3), 2017-02-03
Supplement: MOESM2 [file 12859_2017_1513_MOESM2_ESM.pdf]

### Text S3

#### *An example of standard deviations in a series of technical and biological replicates.*

An example of experimentally measured mass isotopomer spectra with corrected baseline is shown in Table S1.

**Table S1.** Intensities of peaks in m/z spectra corresponding to the mass isotopomers of ribose-5-phosphate

| Sample name | M-1  | M       | M+1    | M+2    | M+3   | M+4   | M+5  | M+6  |
|-------------|------|---------|--------|--------|-------|-------|------|------|
| RibNor1_01  | 3974 | 1063984 | 272009 | 143895 | 38544 | 23614 | 2243 | 990  |
| RibNor1_02  | 3119 | 721679  | 182976 | 97154  | 25424 | 14900 | 1578 | 609  |
| RibNor1_03  | 2609 | 732113  | 187751 | 95813  | 25924 | 14795 | 1999 | 508  |
| RibNor2_01  | 2561 | 700110  | 185168 | 94800  | 25559 | 14905 | 1766 | 684  |
| RibNor2_02  | 2166 | 542016  | 137917 | 73172  | 19521 | 11879 | 1162 | 595  |
| RibNor2_03  | 2801 | 894353  | 232028 | 123178 | 32118 | 18454 | 2116 | 1010 |
| RibNor3_01  | 2585 | 662346  | 171763 | 92918  | 24804 | 14428 | 1914 | 344  |
| RibNor3_02  | 2242 | 788305  | 207194 | 109892 | 30734 | 16526 | 1825 | 497  |

Here the column M shows the intensities of the lightest isotopomer (257 in the presented example) obtained for several replicates. (M+i) designates heavier mass isotopomers. (M-1) designates intensities of lighter mass isotopomer appeared due to electron impact in the mass spectrometer. The first digit in the sample name indicates the biological replicate (plate with growing cells), and the last digit indicates the technical replicates (injections of the solution prepared from the same plate).

Table S2 represents the data of Table S1 normalized by the sum of all peaks and the standard deviation calculated for the technical replicates of the same biological sample and the whole set of samples. It shows that even in the latter case the maximal standard deviation is less than 0.35%.

Table S3, which presents the same data after their full correction for the natural isotope occurrence and for the peaks overlapping, shows that the correction procedures practically do not increase the standard deviation of technical as well as biological replicates.

**Table S2.** Normalized intensities of peaks presented in Table S1, expressed as % of the sum of ions from all peaks in the corresponding spectrum, standard deviations, and correction factor.

| Sample     | M-1    | M     | M+1   | M+2    | M+3    | M+4    | M+5    | M+6     |
|------------|--------|-------|-------|--------|--------|--------|--------|---------|
| RibNor1_01 | 0.257  | 68.7  | 17.6  | 9.29   | 2.49   | 1.52   | 0.145  | 0.0639  |
| RibNor1_02 | 0.298  | 68.9  | 17.5  | 9.28   | 2.43   | 1.42   | 0.151  | 0.0581  |
| RibNor1_03 | 0.246  | 69    | 17.7  | 9.03   | 2.44   | 1.39   | 0.188  | 0.0479  |
| SD         | 0.0274 | 0.152 | 0.11  | 0.148  | 0.0316 | 0.0685 | 0.0236 | 0.0081  |
| RibNor2_01 | 0.25   | 68.3  | 18.1  | 9.24   | 2.49   | 1.45   | 0.172  | 0.0667  |
| RibNor2_02 | 0.275  | 68.7  | 17.5  | 9.28   | 2.48   | 1.51   | 0.147  | 0.0755  |
| RibNor2_03 | 0.214  | 68.5  | 17.8  | 9.43   | 2.46   | 1.41   | 0.162  | 0.0773  |
| SD         | 0.0303 | 0.241 | 0.281 | 0.0993 | 0.0165 | 0.047  | 0.0125 | 0.00568 |
| RibNor3_01 | 0.266  | 68.2  | 17.7  | 9.57   | 2.55   | 1.49   | 0.197  | 0.0354  |
| RibNor3_02 | 0.194  | 68.1  | 17.9  | 9.5    | 2.66   | 1.43   | 0.158  | 0.0429  |
| SD         | 0.0512 | 0.06  | 0.154 | 0.051  | 0.0719 | 0.0408 | 0.0279 | 0.00532 |
| SD global  | 0.033  | 0.325 | 0.203 | 0.17   | 0.074  | 0.0473 | 0.0193 | 0.0152  |

Standard deviations (SD and SD global) are calculated for the technical replicates and for the global set of samples that unites the technical and biological replicates (n=8). The designations of the columns and rows are the same as in Table S1.

**Table S3.** Fully corrected mass isotopomer distributions (mole percent) calculated for each technical replicate from the data presented in Table S2, and standard deviations.

| Sample     | M     | M+1   | M+2   | M+3    | M+4    | M+5    |
|------------|-------|-------|-------|--------|--------|--------|
| RibNor1_01 | 79.2  | 10.5  | 7.26  | 1.76   | 1.29   | 0.016  |
| RibNor1_02 | 79.5  | 10.4  | 7.26  | 1.69   | 1.18   | 0.029  |
| RibNor1_03 | 79.5  | 10.6  | 6.95  | 1.74   | 1.15   | 0.069  |
| SD         | 0.171 | 0.115 | 0.178 | 0.0332 | 0.0719 | 0.0276 |

|            |        |        |       |        |        |        |
|------------|--------|--------|-------|--------|--------|--------|
| RibNor2_01 | 78.7   | 11.1   | 7.14  | 1.77   | 1.21   | 0.049  |
| RibNor2_02 | 79.3   | 10.4   | 7.26  | 1.74   | 1.27   | 0.02   |
| RibNor2_03 | 78.9   | 10.8   | 7.39  | 1.71   | 1.17   | 0.041  |
| SD         | 0.288  | 0.348  | 0.122 | 0.0296 | 0.0503 | 0.015  |
| RibNor3_01 | 78.6   | 10.7   | 7.55  | 1.8    | 1.24   | 0.071  |
| RibNor3_02 | 78.5   | 11     | 7.43  | 1.92   | 1.17   | 0.037  |
| SD         | 0.105  | 0.176  | 0.08  | 0.0848 | 0.0516 | 0.024  |
| SD global  | 0.387  | 0.26   | 0.183 | 0.0705 | 0.0512 | 0.0206 |
| D          | -1.196 | -0.381 | 1.227 | 0.159  | 0.162  | 0.030  |

The presented data are those given in Table S2, corrected for naturally occurring isotopes and for peaks overlapping. The latter was performed based on the difference “**D**” between the really measured and theoretical distribution calculated for the naturally labeled sample as explained in the main text. This difference is shown in the last row. Standard deviations (SD and SD global) are calculated respectively for the technical replicates and for the global set of samples that unites the technical and biological replicates (n=8). The designations of the columns and rows are the same as in Table S1.

The last row in Table S3 shows the difference between the really measured and theoretical distribution calculated for the naturally labeled sample. Its maximal absolute value is much higher than the SD of all technical replicates as well as the SD for the whole set of samples.
